# Supplementary material for: DNA Damage Inducible Protein 1 is Involved in Cold Adaption of Harvested Cucumber Fruit
Source: Front Plant Sci. 2020 Jan 24;10:1723. doi: 10.3389/fpls.2019.01723 (PMC6992665; doi:10.3389/fpls.2019.01723)
Supplement: Supplementary file 7 [file Table_1.doc]

**Table S1. Specific primers used in PCR amplification.**

| Application | Primer sequences (5’–3’) | Amplicon | NCBI/AGI code | Restriction Site |
| --- | --- | --- | --- | --- |
| Full length cloning for *CsDDI1* | F1: GGGGTACCATGAGAATCACTGTGATGACAG | 1224 bp | XM_004139719.2 | *Kpn I* |
| F2: GGACTAGTTTCATCCAAAAAGAAACCCAGC | *Spe I* |
| Subcellular localization for *CsDDI1* | F3:GGGGTACCATGAGAATCACTGTGATGACAGC | 1221 bp | XM_004139719.2 | *Kpn I* |
| F4:GGACTAGTAAAAAGAAACCCAGCTGCCTG | *Spe I* |
| *CsActin* | F: AGGCCGTTCTGTCCCTCTAC | 150 bp | AB698859 |  |
| R: CAGTAAGGTCACGACCAGCA |
| *AtActin* | F: GCCAGTGGGCATTGGATTTG | 108 bp | AT3G12110 |
| R: CTCCAATCATGTGGTTCGGC |
| qPCR analysis for *CsDDI1* | F: TCACTGTGATGACAGCCGAC | 82 bp | XM_004139719.2 |
| R: AGCAGAGCCTTCACGTTCTC |
| qPCR analysis for *CsDDR1/DDT1* | F: CAGCGGCACAAAGGATGATG | 116 bp | XM_004134561.2 |
| R: TCCAGCACGCAAATCTGTCT |
| qPCR analysis for *CsDDB1* | F: ATGTGCAAACCCGTGGAGAT | 113 bp | XM_004135491.2 |
| R: ATTGTAGTCCCGGGCTCTCT |
| qPCR analysis for *AtCAT2* | F: CAAGTGTGGGGTGTCGAGAG | 117 bp | AT1G20630 |
| R: ACCCCAAAATGTCAAAACCAAGTT |
| qPCR analysis for *AtSOD1* | F: TCCTGAGATCACAAAGGCCAA | 101 bp | AT1G08830 |
| R: TCGCCTTCCTGGGTGAAAAA |
| qPCR analysis for *AtCOR47* | F: GACGTGTCTAATGGCCCACA | 96 bp | AT1G20440 |
| R: TAAAAGAGGTGGGAACGGGC |
| qPCR analysis for *AtCOR15b* | F: CAACTTGATGGCCGACCTCT | 84 bp | AT2G42530 |
| R: AGAAGAGTTTTCGTTGGTTCGT |
| qPCR analysis for *AtPR1* | F: CTCGGAGCTACGCAGAACAA | 87 bp | AT2G14610 |
| R: CGCTACCCCAGGCTAAGTTT |
| qPCR analysis for *AtHSP20* | F: CGTGGATGGAGGACGAGTTT | 119 bp | AT2G03020 |
| R: ATCGCCGGTGATTTCCACAA |
| qPCR analysis for *AtCML30* | F: TTTGAACGGCGATGGGAAGA | 96 bp | AT2G15680 |
| R: ACCATCCTGTTGCAGTCCTC |
| qPCR analysis for *AtRD29A* | F: ACGTTTGCTCCAAGTGGTGA | 79 bp | AT5G52310 |
| R: CCTCCAACGTTATCGGGGTC |
| qPCR analysis for *AtNIA2* | F: CATTTTCCTTTGCGCCACCA | 90 bp | AT1G37130 |
| R: AGCTCGAAGTAGCCAACCAC |
| qPCR analysis for *AtRH9* | F: GCCGTTACTCTGGTGGTTCA | 126 bp | AT1G18950 |
| R: CAAACCCACCAAAGCTGCTC |
| qPCR analysis for *AtPHR1* | F: TTGCCTTCCCTCCATTTTTCG | 101 bp | AT1G12370 |
| R: CTAATGTGCGCCGGTTATGC |
